# Supplementary material
Source: HighWire-hosted journal article supplement (https://thorax.bmj.com/content/73/3/279)
Supplement: inline-supplementary-material-1 [file inline-supplementary-material-1.pdf]

**Supplemental Table 1. Questions from the Agricultural Lung Health Study Early-life Questionnaire Analyzed for Association with Pulmonary Function**

| Question                                                                                                                                                                                        | Possible Responses                                                                             |
|-------------------------------------------------------------------------------------------------------------------------------------------------------------------------------------------------|------------------------------------------------------------------------------------------------|
| Did your mother live on a farm while she was pregnant with you?                                                                                                                                 | Yes, No, Don't Know                                                                            |
| Did your mother perform any farm activities while she was pregnant with you?                                                                                                                    | Yes, No, Don't Know                                                                            |
| Did your mother work with or around farm animals such as cattle, horses, hogs, poultry, sheep or goats while pregnant with you?                                                                 | Yes, No, Don't Know                                                                            |
| Was your family living on a farm when you were born, regardless of whether they were doing farm work?                                                                                           | Yes, No, Don't Know                                                                            |
| At any time before you were age 3, did you spend time around farm animals, such as cattle, horses, hogs, poultry, sheep or goats at least weekly, or for months at a time?                      | Yes, No, Don't Know                                                                            |
| At any time between age 3 and your 6th birthday, did you spend time around farm animals at least weekly or for months at a time?                                                                | Yes, No, Don't Know                                                                            |
| Were you ever breastfed as an infant?                                                                                                                                                           | Yes, No, Don't Know                                                                            |
| When you were a child, what was the main type of milk served in your home?                                                                                                                      | Raw Milk, Pasteurized/Store Bought Milk, No Milk was Served at Home, Don't Know                |
| Have you ever drank raw milk?                                                                                                                                                                   | Yes, No, Don't Know                                                                            |
| If yes, how old were you when you first drank raw milk? If you are not sure of your answer, please provide your best guess                                                                      | Less Than One Year, 1 Year Old, 2 Years Old, 3 Years Old, 4 Years Old, 5 Years Old, 6 or Older |
| How old were you when you last drank raw milk? If less than one year old, write "00". If you still drink raw milk, write your current age. If you are not sure, please provide your best guess. | Open Response                                                                                  |
| At any time before you were age 6, did you have any dogs, cats, other furry pets such as hamsters, or birds living inside your home?                                                            | Yes, No, Don't Know                                                                            |
| Did your mother smoke cigarettes when she was pregnant with you?                                                                                                                                | Yes, No, Don't Know                                                                            |
| At any time before you were age 6, did anyone living in your home smoke cigarettes?                                                                                                             | Yes, No, Don't Know                                                                            |
| If Yes, at any time before you were age 6, did your mother smoke cigarettes?                                                                                                                    | Yes, No, Don't Know                                                                            |
| At any time before you were age 6, did your father smoke cigarettes?                                                                                                                            | Yes, No, Don't Know                                                                            |

**Supplemental Table 2. Demographics of Participants  
in the Agricultural Lung Health Study, 2009-2013**

| <b>Characteristic</b> | <b>N (%)</b> |
|-----------------------|--------------|
| Sex                   |              |
| Female                | 1509 (49.3)  |
| Male                  | 1552 (50.7)  |
| Enrollment Status     |              |
| Farmer                | 1603 (52.4)  |
| Spouse                | 1458 (47.6)  |
| State                 |              |
| Iowa                  | 2173 (71.0)  |
| North Carolina        | 888 (29.0)   |
| Race                  |              |
| White                 | 3011 (98.4)  |
| Non-white             | 50 (1.6)     |
| Current Asthma Status |              |
| Case                  | 1125 (36.8)  |
| Non-case              | 1936 (63.3)  |
| Smoking Status        |              |
| Never                 | 2036 (66.5)  |
| Former                | 894 (29.2)   |
| Current               | 131 (4.3)    |
| Age                   |              |
| Mean (SD)             | 63.0 (11.0)  |
| Pack-years            |              |
| Mean (SD)             | 5.9 (14.7)   |

**Supplemental Table 3. Sensitivity Analyses for Associations between Raw Milk Exposure and Pulmonary Function in the Agricultural Lung Health Study**

| Analysis                                                                                                   | N    | FEV <sub>1</sub>    |         | FVC                |         |
|------------------------------------------------------------------------------------------------------------|------|---------------------|---------|--------------------|---------|
|                                                                                                            |      | β (95%CI)           | P-value | β (95%CI)          | P-value |
| <b>Adjusted for Recent Raw Milk Consumption<sup>a</sup></b>                                                |      |                     |         |                    |         |
| <b>Ever Raw Milk</b>                                                                                       |      |                     |         |                    |         |
| No                                                                                                         | 643  | Referent            |         | Referent           |         |
| Yes                                                                                                        | 2212 | 50.9 (3.3, 98.4)    | 0.04    | 65.3 (11.4, 119.2) | 0.02    |
| Missing                                                                                                    | 172  |                     |         |                    |         |
| <b>Excluding 197 Raw Milk Drinkers Whose Consumption May Have Started After Age 18<sup>b</sup></b>         |      |                     |         |                    |         |
| <b>Ever Raw Milk</b>                                                                                       |      |                     |         |                    |         |
| No                                                                                                         | 643  | Referent            |         | Referent           |         |
| Yes                                                                                                        | 2049 | 49.4 (1.6, 97.3)    | 0.04    | 67.6 (13.6, 121.6) | 0.01    |
| Missing                                                                                                    | 172  |                     |         |                    |         |
| <b>Duration of Raw Milk Consumption Among Those Who Started Drinking Raw Milk Before Age 6<sup>c</sup></b> |      |                     |         |                    |         |
| Difference in FEV <sub>1</sub> or FVC (ml) per year                                                        | 1888 | -0.18 (-1.61, 1.26) | 0.81    | 0.79 (-0.83, 2.41) | 0.34    |
| <b>Excluding 360 Individuals with a FVC quality attribute of "C"<sup>d</sup></b>                           |      |                     |         |                    |         |
| <b>Ever Raw Milk</b>                                                                                       |      |                     |         |                    |         |
| No                                                                                                         | 595  | Referent            |         | Referent           |         |
| Yes                                                                                                        | 1953 | 48.3 (0.3, 96.2)    | 0.05    | 62.3 (8.0, 116.6)  | 0.02    |
| Missing                                                                                                    | 153  |                     |         |                    |         |

<sup>a</sup>Estimates adjusted for age, age<sup>2</sup>, gender, race, state, height, height<sup>2</sup>, smoking status, pack-years, asthma status, and recent raw milk consumption (yes or no drink raw milk in last 10 years). FVC estimates also adjusted for weight. Estimates represent the difference in mean response (FEV<sub>1</sub> and FVC in milliliters) between a subject who drank raw milk and one who did not, holding all covariates constant. 168 raw milk drinkers drank raw milk within the last 10 years. 34 raw milk drinkers have missing information regarding timing of last consumption.

<sup>b</sup>Estimates adjusted for age, age<sup>2</sup>, gender, race, state, height, height<sup>2</sup>, smoking status, pack-years, asthma status. FVC estimates also adjusted for weight. Estimates represent the difference in mean response (FEV<sub>1</sub> and FVC in milliliters) between a subject who drank raw milk and one who did not, holding all covariates constant. The 197 excluded individuals did not start drinking raw milk before age 6 or did not stop before age 18 and thus we could not confirm that raw milk consumption started in childhood (i.e. prior to age 18).

<sup>c</sup>Estimates adjusted for age, age<sup>2</sup>, gender, race, state, height, height<sup>2</sup>, smoking status, pack-years, asthma status. FVC estimates also adjusted for weight. Estimates represent the difference in mean response (FEV<sub>1</sub> and FVC in milliliters) for each year increase in drinking raw milk, holding all covariates constant.

<sup>d</sup>Estimates adjusted for age, age<sup>2</sup>, gender, race, state, height, height<sup>2</sup>, smoking status, pack-years, asthma status. FVC estimates also adjusted for weight. Estimates represent the difference in mean response (FEV<sub>1</sub> and FVC in milliliters) between a subject who drank raw milk and one who did not, holding all covariates constant. 360 individuals whose FVC values had a quality attribute of "C" were excluded, leaving 2,701 individuals whose FVC values had a quality attribute of "A" or "B".

**Supplemental Table 4. Associations between Raw Milk Exposures and Pulmonary Function Stratified by Gender, Asthma Status, Atopy Status, and Number of Siblings in the Agricultural Lung Health Study**

| Early-life Exposures | N    | FEV <sub>1</sub>                 |                                       | FVC                               |                                       |
|----------------------|------|----------------------------------|---------------------------------------|-----------------------------------|---------------------------------------|
|                      |      | $\beta$ (95%CI) <sup>1</sup>     | P <sub>Interaction</sub> <sup>2</sup> | $\beta$ (95%CI) <sup>1</sup>      | P <sub>Interaction</sub> <sup>2</sup> |
| <b>Females</b>       |      |                                  |                                       |                                   |                                       |
| Raw Milk             |      |                                  |                                       |                                   |                                       |
| No                   | 401  | Referent                         |                                       | Referent                          |                                       |
| Yes                  | 993  | 58.0 (9.9, 106.0) <sup>a</sup>   |                                       | 68.1 (14.4, 121.8) <sup>a</sup>   |                                       |
| Missing              | 115  |                                  |                                       |                                   |                                       |
| <b>Males</b>         |      |                                  |                                       |                                   |                                       |
| Raw Milk             |      |                                  |                                       |                                   |                                       |
| No                   | 242  | Referent                         | 0.05 <sup>b</sup>                     | Referent                          | 0.19 <sup>b</sup>                     |
| Yes                  | 1253 | 36.5 (-48.4, 121.3) <sup>a</sup> |                                       | 56.4 (-40.4, 153.3) <sup>a</sup>  |                                       |
| Missing              | 57   |                                  |                                       |                                   |                                       |
| <b>Non-Asthmatic</b> |      |                                  |                                       |                                   |                                       |
| Raw Milk             |      |                                  |                                       |                                   |                                       |
| No                   | 412  | Referent                         |                                       | Referent                          |                                       |
| Yes                  | 1420 | 61.0 (4.9, 117.1) <sup>c</sup>   |                                       | 66.2 (0.9, 131.5) <sup>c</sup>    |                                       |
| Missing              | 104  |                                  |                                       |                                   |                                       |
| <b>Asthmatic</b>     |      |                                  |                                       |                                   |                                       |
| Raw Milk             |      |                                  |                                       |                                   |                                       |
| No                   | 231  | Referent                         | 0.07 <sup>d</sup>                     | Referent                          | 0.30 <sup>d</sup>                     |
| Yes                  | 826  | 23.1 (-59.3, 105.5) <sup>c</sup> |                                       | 53.2 (-36.7, 143.0) <sup>c</sup>  |                                       |
| Missing              | 68   |                                  |                                       |                                   |                                       |
| <b>Non-Atopic</b>    |      |                                  |                                       |                                   |                                       |
| Raw Milk             |      |                                  |                                       |                                   |                                       |
| No                   | 489  | Referent                         |                                       | Referent                          |                                       |
| Yes                  | 1802 | 50.7 (-2.6, 104.0) <sup>e</sup>  |                                       | 56.1 (-3.9, 116.2) <sup>e</sup>   |                                       |
| Missing              | 124  |                                  |                                       |                                   |                                       |
| <b>Atopic</b>        |      |                                  |                                       |                                   |                                       |
| Raw Milk             |      |                                  |                                       |                                   |                                       |
| No                   | 130  | Referent                         | 0.62 <sup>f</sup>                     | Referent                          | 0.32 <sup>f</sup>                     |
| Yes                  | 388  | 47.6 (-59.4, 154.6) <sup>e</sup> |                                       | 108.1 (-14.1, 230.3) <sup>e</sup> |                                       |
| Missing              | 40   |                                  |                                       |                                   |                                       |
| <b>0-2 Siblings</b>  |      |                                  |                                       |                                   |                                       |
| Raw Milk             |      |                                  |                                       |                                   |                                       |
| No                   | 430  | Referent                         |                                       | Referent                          |                                       |
| Yes                  | 1284 | 34.9 (-23.8, 93.5) <sup>g</sup>  |                                       | 39.1 (-27.4, 105.5) <sup>g</sup>  |                                       |
| Missing              | 103  |                                  | 0.40 <sup>h</sup>                     |                                   | 0.28 <sup>h</sup>                     |
| <b>3+ Siblings</b>   |      |                                  |                                       |                                   |                                       |
| Raw Milk             |      |                                  |                                       |                                   |                                       |
| No                   | 212  | Referent                         |                                       | Referent                          |                                       |
| Yes                  | 960  | 78.1 (-0.6, 156.7) <sup>g</sup>  |                                       | 111.2 (21.9, 200.6) <sup>g</sup>  |                                       |
| Missing              | 69   |                                  |                                       |                                   |                                       |

<sup>a</sup>Estimates adjusted for age, age<sup>2</sup>, race, state, height, height<sup>2</sup>, smoking status, pack-years, asthma status (and weight for FVC). Estimates represent the difference in mean response (FEV<sub>1</sub> and FVC in milliliters) between a subject who experienced the exposure and one who did not, holding all covariates constant.

<sup>b</sup>FEV<sub>1</sub> and FVC (in milliliters) regressed on raw milk, gender, raw milk\*gender, age, age<sup>2</sup>, race, state, height, height<sup>2</sup>, smoking status, pack-years, asthma status (and weight for FVC). P-value for the interaction term raw milk\*gender.

<sup>c</sup>Estimates adjusted for age, age<sup>2</sup>, gender, race, state, height, height<sup>2</sup>, smoking status, pack-years (and weight for FVC). Estimates represent the difference in mean response (FEV<sub>1</sub> and FVC in milliliters) between a subject who experienced the exposure and one who did not, holding all covariates constant.

<sup>d</sup>FEV<sub>1</sub> and FVC (in milliliters) regressed on raw milk, asthma status, raw milk\*asthma status, age, age<sup>2</sup>, gender, race, state, height, height<sup>2</sup>, smoking status, pack-years (and weight for FVC). P-value for the interaction term raw milk\*asthma status.

<sup>e</sup>Estimates adjusted for age, age<sup>2</sup>, gender, race, state, height, height<sup>2</sup>, smoking status, pack-years, asthma status (and weight for FVC). Estimates represent the difference in mean response (FEV<sub>1</sub> and FVC in milliliters) between a subject who experienced the exposure and one who did not, holding all covariates constant. 88 individuals were missing atopy status and therefore not included in atopy stratified analysis. Atopic defined as specific IgE > 0.70 IU/ml to at least one of ten

allergens measured in blood: seasonal (Bermuda grass, ragweed, Timothy grass, mountain cedar), perennial (*Alternaria*, dust mite, cat dander), and food (milk, egg, wheat).

<sup>f</sup>FEV<sub>1</sub> and FVC (in milliliters) regressed on raw milk, atopy status, raw milk\*atopy status, age, age<sup>2</sup>, gender, race, state, height, height<sup>2</sup>, smoking status, pack-years, asthma status (and weight for FVC). P-value for the interaction term raw milk\*atopy status.

<sup>g</sup>Estimates adjusted for age, age<sup>2</sup>, gender, race, state, height, height<sup>2</sup>, smoking status, pack-years, asthma status (and weight for FVC). Estimates represent the difference in mean response (FEV<sub>1</sub> and FVC in milliliters) between a subject who experienced the exposure and one who did not, holding all covariates constant. 3 individuals were missing number of siblings and therefore not included in number of siblings stratified analysis. Number of siblings dichotomized as 0-2 siblings or 3+ siblings.

<sup>h</sup>FEV<sub>1</sub> and FVC (in milliliters) regressed on raw milk, number of siblings, raw milk\*number of siblings, age, age<sup>2</sup>, gender, race, state, height, height<sup>2</sup>, smoking status, pack-years, asthma status (and weight for FVC). P-value for the interaction term raw milk\*number of siblings.
